# Supplementary material
Source: ML conference proceedings conference paper supplement (https://openreview.net/forum?id=xiFJn0fbFX9)
Supplement: supplementary_material [file attachment]

558 **Python Repo:** <https://github.com/XanderJC/medkit-learn>

## 559 **A Domains and Real Data Information**

### 560 **A.1 Hospital Wards.**

561 The *Ward* domain is based on the care of 6,321 patients at the Ronald Reagan UCLA Medical Center  
 562 in California who were treated on the general medicine floor between 2013-2016 [4]. These patients  
 563 were treated for a variety of conditions including pneumonia, sepsis, and fevers were in general stable  
 564 and deterioration that required ICU care was rare. Measurements were taken roughly every 4 hours,  
 565 with average stays lasting 9 days, and include common vital signs such as pulse and blood pressure  
 566 alongside lab tests and results and include 8 static (although categorical features are one-hot encoded,  
 567 extending the space) and 35 temporal features for which we model the dynamics. The action space is  
 568 taken as a choice of one to three binary actions (encoded for a maximum size of eight) marking the  
 569 treatment of various oxygen therapy devices.

### 570 **A.2 Intensive Care Unit.**

571 The *ICU* domain simulates the treatment of 23,106 of patients in the intensive care unit from  
 572 Amsterdam UMC [19]. These patients are in a more critical state than those on the general wards  
 573 while suffering similarly from a variety of conditions and consequently are monitored more frequently,  
 574 with the database containing around 1 billion clinical observations at varying timesteps down to  
 575 minute by minute recordings. We aggregate data into one hour timesteps and model the treatment of  
 576 mechanical ventilation alongside the prescription of antibiotics and oxygentherapy. We include 36  
 577 static features including height, initial weight, and commorbidities with 24 series features focusing  
 578 on vital signs including heart rate, blood pressure, and various chemical blood concentration levels.

## 579 **B Further Environment Model Details**

### 580 **B.1 The Customised State Space Model**

581 The CSS is a variety of a deep non-Markovian hidden state-space model. The *non-Markovianity*  
 582 comes from the property in the model that transitions are parameterised given discrete states simply  
 583 as follows:

$$\begin{aligned} p(z_t | \vec{x}_{t-1}, \vec{y}_{t-1}, \vec{z}_{t-1}) &= p(z_t | \vec{\alpha}_t, \vec{z}_{t-1}) \\ &= \sum_{t'=1}^{t-1} \alpha_{t'}^{t-1} \mathbf{P}_{y_{t'}}(z_{t'}, z_t), \end{aligned} \quad (7)$$

584 with  $\mathbf{P}_{y_t}$  a baseline transition matrix given intervention  $y_t$  is made and  $\alpha_{t'}^{t-1}$  some attention weight  
 585 on the previous timesteps such that  $\sum_{t'=1}^{t-1} \alpha_{t'}^{t-1} = 1$ . This departs from the traditional IOHMM [57]  
 586 by the inclusion of the attention weights that induce time-dependency on points further in the past  
 587 than the previous time point and can be learnt during training.

588 As described in the main text, the *deep* aspect is manifested in the emission probability distribution  
 589 whose parameters are predicted from the output of a neural network that takes the static features and  
 590 current state.

591 **Learning and inference.** Exact inference over the hidden states in this model is intractable and so  
 592 we use an inference network to parameterise an approximate posterior over the latent hidden state, in  
 593 particular assuming a factorisation that mirrors the true structure of the posterior as follows:

$$q_\phi(\vec{z}_T | \vec{x}_T, \vec{y}_T) = q_\phi(z_1 | \vec{x}_T, \vec{y}_T) \prod_{t=2}^T q_\phi(z_t | z_{t-1}, \vec{x}_{t:T}, \vec{y}_{t:T}). \quad (8)$$

594 Thus the posterior depends on the previous hidden state and all future observations and actions. This  
 595 can be practically achieved by using a backward LSTM [27] to summarise the future into its hidden  
 596 state before passing that and the previous state into a new network to obtain the approximate posterior.

597 Our inference network leads to a factorised Evidence Lower BOund (ELBO) given by:

$$\log p_{\theta}(\vec{x}_T|\vec{y}_{T-1}) \geq \mathbb{E}_{q_{\phi}}[\log p_{\theta}(\vec{x}_T, \vec{z}_T|\vec{y}_{T-1}) - \log q_{\phi}(\vec{z}_T|\vec{x}_T, \vec{y}_T)], \quad (9)$$

598 leading to an optimisation task over  $\theta$  and  $\phi$ . This is readily done using stochastic variational inference  
599 whereby we take a Monte Carlo estimate of the ELBO by sampling from the posterior and taking  
600 gradients [38].

## 601 B.2 The Sequential VAE Model

602 The SVAE is again a variety of a deep non-Markovian hidden state-space model, although now  
603 the states are no longer discrete but rather live in some latent space of  $\mathbb{R}^d$ . This again means that  
604 an inference network is required for doing approximate inference and similarly leads to an ELBO  
605 optimisation scheme.

## 606 C Further Experimental Details

### 607 C.1 Computation

608 All experiments were performed on a 2016 MacBook Pro, using a 2.9 GHz Dual-Core Intel Core i5  
609 with 8GB of LPDDR3 RAM and no GPU acceleration.

### 610 C.2 Predictive Score

611 The predictive score measures how well the synthetic data can be used as a direct substitute for real  
612 data when it comes to a prediction task.

613 For our experiments we generate 500 sample trajectories of maximum length 30 to be used as the  
614 synthetic data. A network consisting of an LSTM layer followed by two fully connected layers is then  
615 trained on this data for 50 epochs. This is then applied to a real data set and the AUROC is reported.

### 616 C.3 Discriminative Score

617 The discriminative score measures how well the synthetic data ‘hides’ amongst real data.

618 For our experiments a training dataset is generated using 100 real trajectories and 100 synthetic  
619 trajectories along with their associated real/synthetic label. A single layer LSTM is then trained on  
620 this dataset to predict the label, before being applied to a test set of 100 real trajectories and 100  
621 synthetic trajectories. We report the absolute value of the test accuracy minus 0.5.

### 622 C.4 Imitation Learning Benchmarks

623 All methods used are based on neural network and so in the experiments we maintain the same  
624 architecture of 2 hidden layers of 64 units each connected by exponential linear unit (ELU) activation  
625 functions.

626 Publicly available code was used in the implementations of a number of the benchmarks, specifically:

627 • VDICE [37]:  
628 [https://github.com/google-research/google-research/tree/master/](https://github.com/google-research/google-research/tree/master/value_dice)  
629 [value\\_dice](https://github.com/google-research/google-research/tree/master/value_dice)  
630

631 • EDM [31]:  
632 <https://github.com/wgrathwohl/JEM>

633 Note that VDICE was originally designed for continuous actions with a Normal distribution output  
634 which we adapt for the experiments by replacing with a Gumbel-softmax.

## References

- [4] Alaa, A. M., Yoon, J., Hu, S., and Van der Schaar, M. (2017). Personalized risk scoring for critical care prognosis using mixtures of gaussian processes. *IEEE Transactions on Biomedical Engineering*, 65(1):207–218.
- [57] Bengio, Y. and Frasconi, P. (1995). An input output hmm architecture. In *Advances in neural information processing systems*, pages 427–434.
- [19] Elbers, P. W. G. (2019). AmsterdamUMCdb v1.0.2 ICU database.
- [27] Hochreiter, S. and Schmidhuber, J. (1997). Long short-term memory. *Neural computation*, 9(8):1735–1780.
- [38] Krishnan, R., Shalit, U., and Sontag, D. (2017). Structured inference networks for nonlinear state space models. In *Proceedings of the AAAI Conference on Artificial Intelligence*, volume 31.
